# Supplementary material
Source: MDPI journal article supplement (https://www.mdpi.com/2079-6412/12/1/38)
Supplement: s1 [file s1]

# Supplementary Materials: Colorimetric Measurement of Deltamethrin Pesticide Using a Paper Sensor Based on Aggregation of Gold Nanoparticles

Jingyang Zhu <sup>1</sup>, Lifeng Yin <sup>1</sup>, Weiyi Zhang <sup>2</sup>, Meilian Chen <sup>2</sup>, Dongsheng Feng <sup>2</sup>, Yong Zhao <sup>1,\*</sup> and Yongheng Zhu <sup>1,\*</sup>

<sup>1</sup> Laboratory of Quality & Safety Risk Assessment for Aquatic Products on Storage and Preservation (Shanghai), College of Food Science and Technology, Ministry of Agriculture and Shanghai Engineering Research Center of Aquatic-Product Processing & Preservation Shanghai Ocean University, Shanghai 201306, China; 15837688323@163.com (J.Z.); onlylihong666@163.com (L.Y.).

<sup>2</sup> Shanghai Center of Agri-products Quality and Safety (Shanghai), Shanghai 200125, China; zhangharewei@163.com (W.Z.); 13601975089@163.com (M.C.); dosfeng@hotmail.com (D.F.).

\* Correspondence: yzhao@shou.edu.cn (Y.Z.); yh-zhu@shou.edu.cn (Y.Z.); Tel.: +86-021-61900354; +86-021-61900354 (Y.Z.).

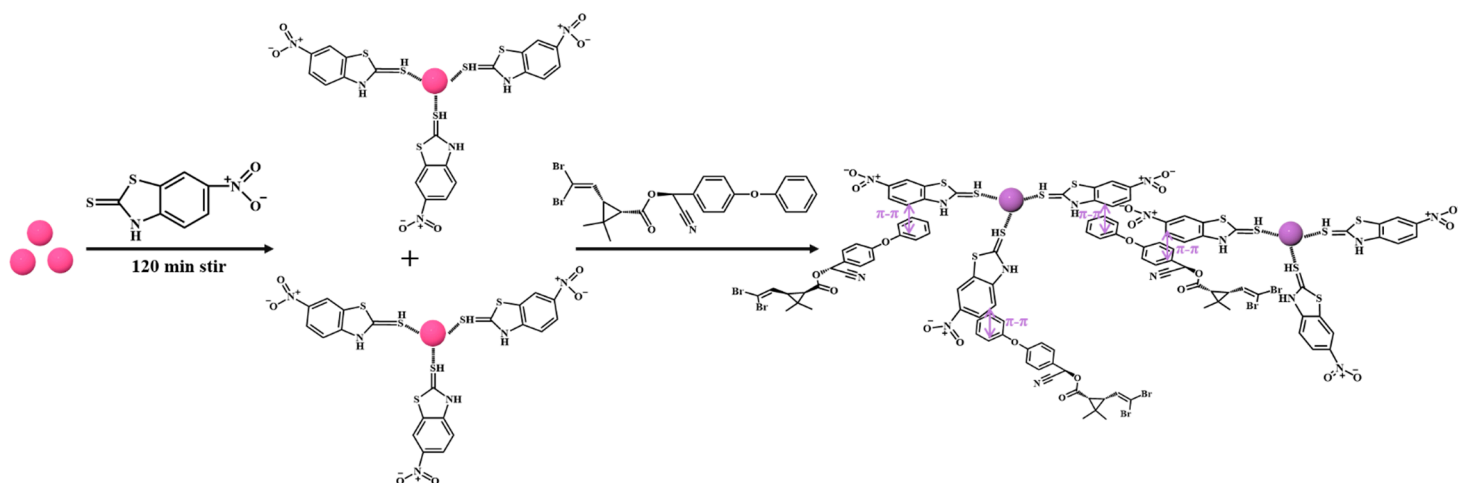

**Figure S1.** Schematic illustration of possible  $\pi$ - $\pi$  stacking mechanism for aggregation of MNBT-AuNPs in the presence of DEL.

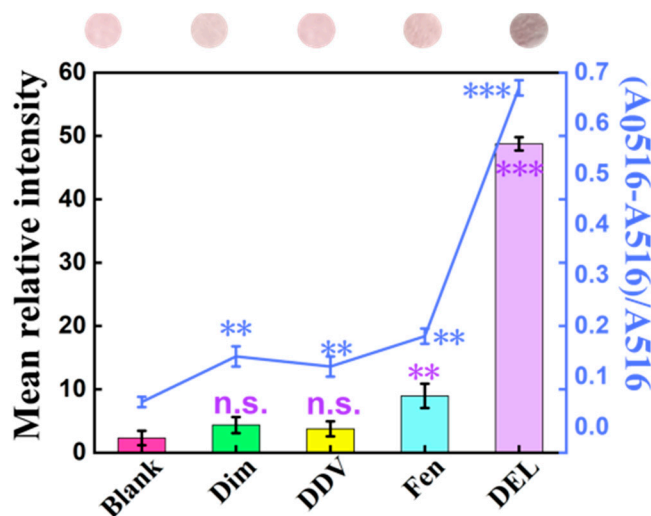

**Figure S2.** Selectivity of the  $\mu$ PAD to different pesticide molecules, including dimethoate, dichlorvos, fenpropathrin, and deltamethrin. (n.s., not significant and \*\*\* $P < 0.001$  compared to Blank condition).
